# Supplementary material for: The effects of hydrothermal aging on NH 3 oxidation over high-loading Cu-SSZ-13 catalysts: an experimental and kinetic modelling study
Source: Royal Society of Chemistry journal article supplement (doi:10.1039/d5cy01496d), 2026-01-01
Supplement: d5cy01496d1.pdf [file d5cy01496d1.pdf]

## Supporting Information

### Hydrothermal aging effects on NH<sub>3</sub> oxidation over high-loading Cu-SSZ-13 catalyst: An experimental and kinetic modeling study

Minghui Rui,<sup>a</sup> Meiqing Shen,<sup>acd</sup> Wei Li,<sup>c</sup> Feng Gao,<sup>cd</sup> Liwei Jia,<sup>c</sup> Xinhua Li<sup>ce</sup> and Gurong Shen<sup>\*b</sup>

<sup>a</sup> School of Chemical Engineering and Technology, Tianjin University, Tianjin 300350, China

<sup>b</sup> School of Materials Science and Engineering, Tianjin University, Tianjin 300350, China

<sup>c</sup> National Rare Earth Catalysis Research Institute, Dongying 257000, China

<sup>d</sup> State Key Laboratory of Engines, Tianjin University, Tianjin 300072, China

<sup>e</sup> Shandong Institute of Petroleum and Chemical Technology, Dongying 257061, China

\*Corresponding author.

E-mail address: gr\_shen@tju.edu.cn

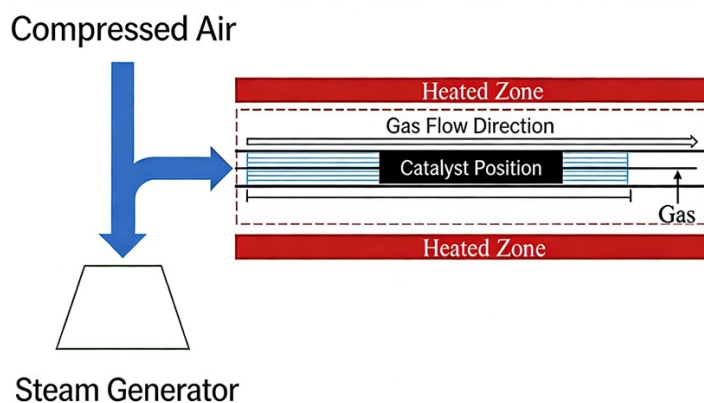

Fig. S1. Schematic diagram of the tube furnace setup for hydrothermal aging.

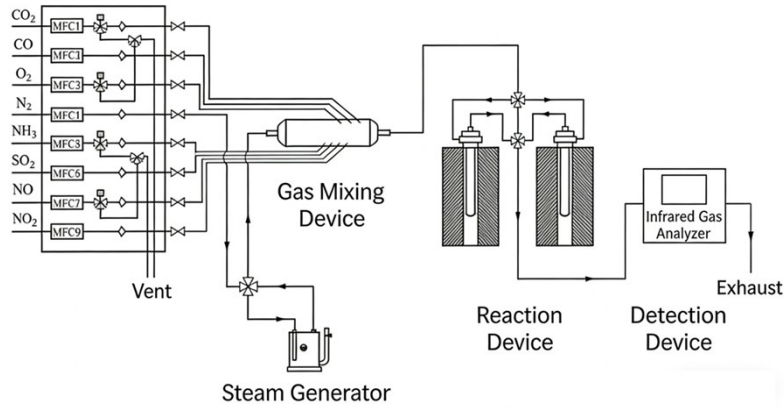

Fig. S2. Schematic diagram of the homemade evaluation system.

Table S1. Cu content of different samples from ICP.

| Samples   | Fresh | 600-16h | 650-16h | 700-16h | 800-16h |
|-----------|-------|---------|---------|---------|---------|
| Cu (wt.%) | 3.83  | 3.83    | 3.83    | 3.83    | 3.83    |

ICP results in Table S1 show that the Cu content of all samples remains consistent with that of the fresh sample (3.83 wt.%).

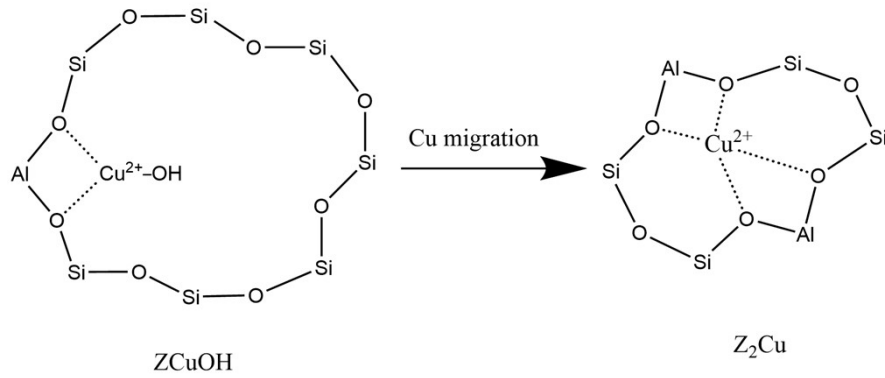

Fig. S3. Different positions of ZCuOH and Z<sub>2</sub>Cu and the Cu migration process.

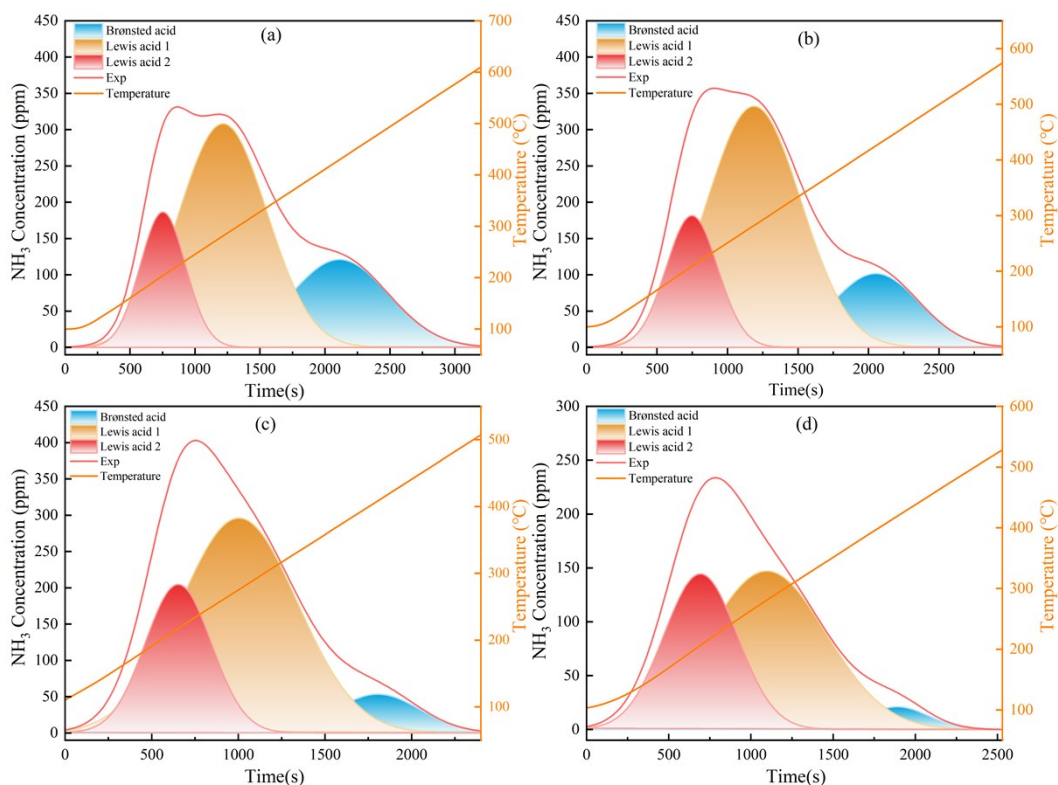

Fig. S4. Peak fitting results of  $\text{NH}_3$ -TPD over different aged samples. (a) 600-16h sample; (b) 650-16h sample; (c) 700-16h sample; (d) 800-16h sample.

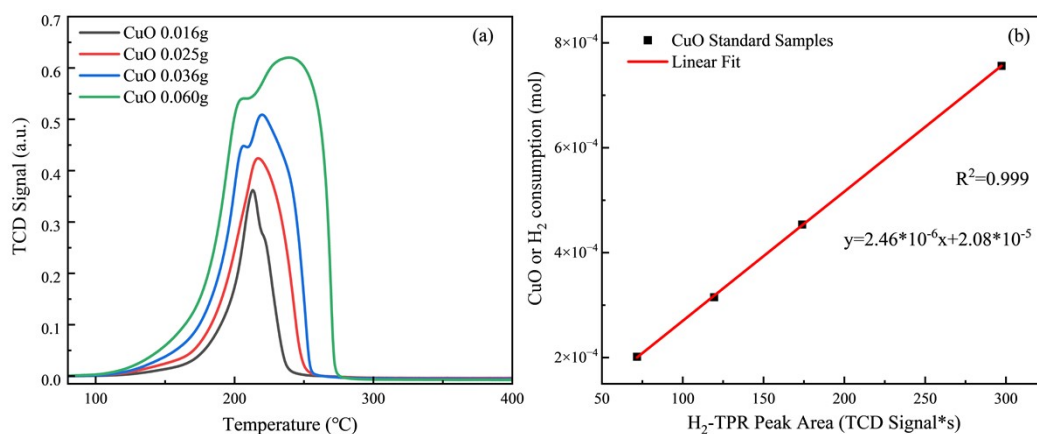

Fig.S5. (a)  $\text{H}_2$ -TPR results over CuO standard samples. (b) The linear relationship between  $\text{H}_2$ -TPR peak area (TCD Signal\*s) and CuO or  $\text{H}_2$  consumption.

As shown in Fig. S5, there are two reduction peaks attributed to R2 and R3, respectively. Additionally, a linear relationship between  $\text{H}_2$ -TPR peak area (TCD Signal\*s) and  $\text{H}_2$  consumption was established, providing a calibration factor for subsequent quantitative work.

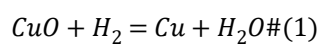

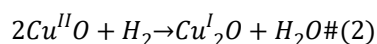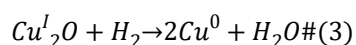

The abscissa (temperature) in Fig. 5 was converted to time (s). After removing the instrument-provided baseline, the peaks below 450 °C were integrated to obtain the TCD Signal\*s values. Subsequently, the actual H<sub>2</sub> consumption (below 450 °C) was calculated using the calibration curve  $y=2.46*10^{-6}x+2.08*10^{-5}$  (Fig. S5), and the results are listed in Table S2.

Table S2. H<sub>2</sub> consumption below 450 °C of different samples. (0.3 g catalyst)

| Samples                           | Fresh | 600-16h | 650-16h | 700-16h | 800-16h |
|-----------------------------------|-------|---------|---------|---------|---------|
| H <sub>2</sub> consumption (μmol) | 103   | 98      | 99      | 106     | 110     |

The theoretical H<sub>2</sub> consumption was calculated based on the stoichiometric ratio of the relevant reduction reaction. According to reaction equations R4 ( $ZCu^{II}OH + \frac{1}{2}H_2 \rightarrow ZCu^I + H_2O$ ) and R5 ( $Z_2Cu^{II} + \frac{1}{2}H_2 \rightarrow ZCu^I + ZH$ ). 1 mole of Cu<sup>2+</sup> consumes 0.5 moles of H<sub>2</sub>. In contrast, 1 mole of CuO consumes 1 mole of H<sub>2</sub>. Taking the fresh catalyst sample as an example: the catalyst contains Cu<sup>2+</sup> at a content of 3.07 wt.% (equivalent to 483.7 μmol/g) and CuO at a content of 0.76 wt.% (equivalent to 95.1 μmol/g). The theoretical H<sub>2</sub> consumption of 0.3 g catalyst is calculated as follows:

$$H_2 \text{ consumption} = (483.7/2+95.1) * 0.3 = 101 \text{ (}\mu\text{mol)}$$

By the same token, the theoretical H<sub>2</sub> consumption of 800-16h sample is calculated to be 115 (μmol). Notably, the theoretical H<sub>2</sub> consumption values derived from stoichiometric ratio calculations are in good agreement with the experimental results presented in Table S2.

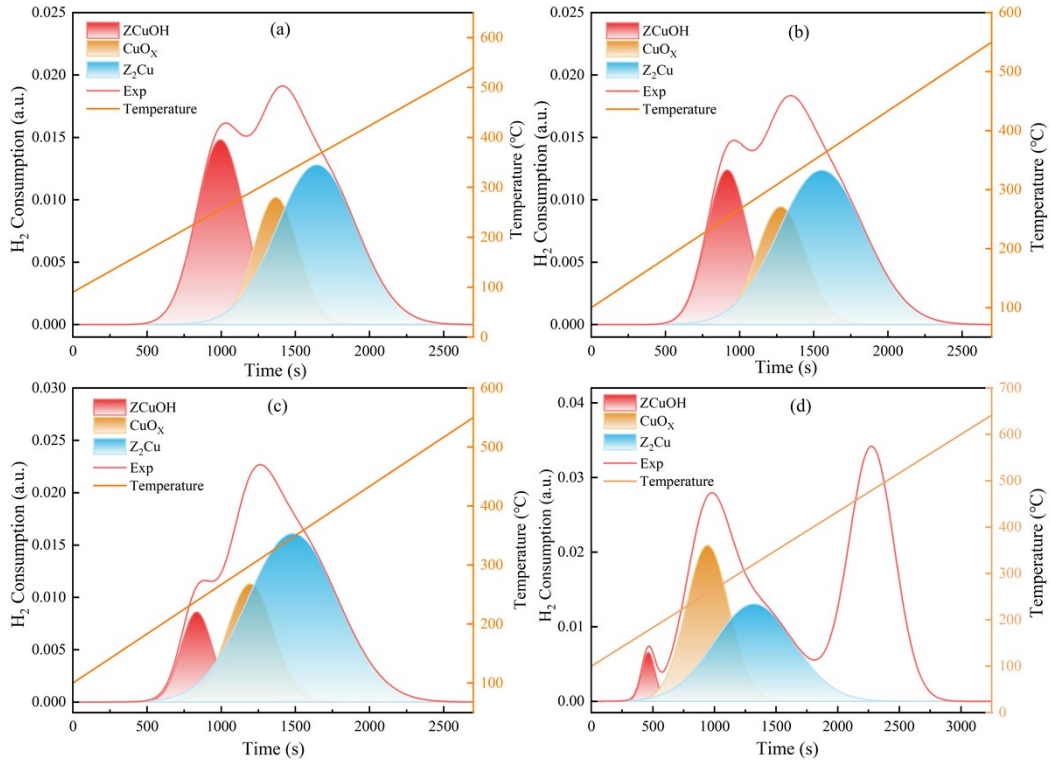

Fig.S6. Experimental and peak fitting of H<sub>2</sub>-TPR results. (a) 600-16h sample; (b) 650-16h sample; (c) 700-16h sample; (d) 800-16h sample.

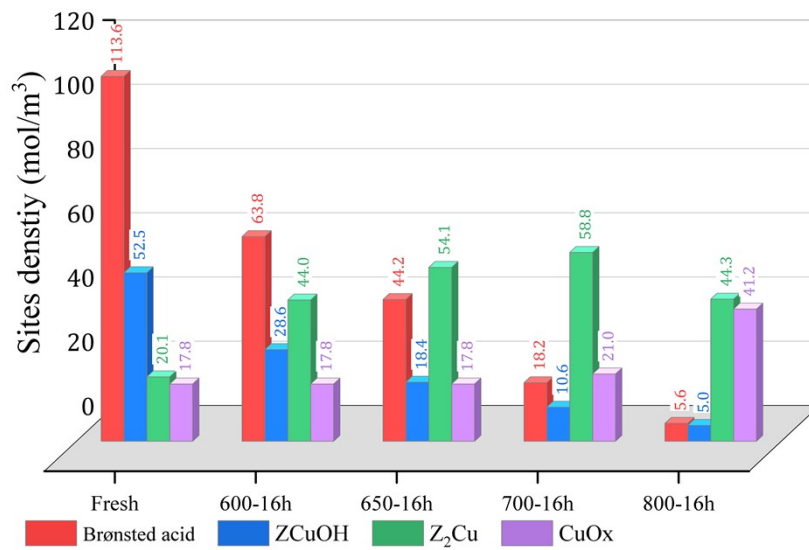

Fig. S7. Site density at different sites of fresh catalyst and different aged samples.

Based on the results of NH<sub>3</sub>-TPD, NO+NH<sub>3</sub> titration, and H<sub>2</sub>-TPR, it is known that when the coating amount is 150g/L, the site density of each site can be calculated, which provides a basis for model establishment.

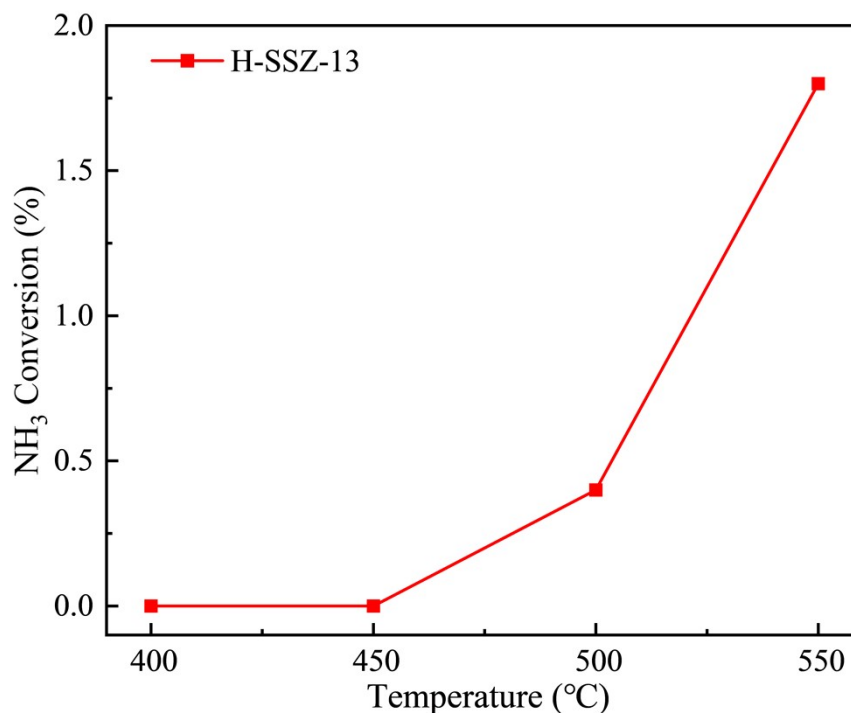

Fig.S8. NH<sub>3</sub> oxidation results of H-SSZ-13. 100 mg catalyst was used; GHSV=100,000 h<sup>-1</sup>, NH<sub>3</sub>=500 ppm, O<sub>2</sub>=10%, H<sub>2</sub>O=3.8%, N<sub>2</sub> balance.

As shown in Fig. S8, NH<sub>3</sub> oxidation tests under same conditions were conducted over the model catalyst H-SSZ-13, which exhibited negligible NH<sub>3</sub> conversion in the low-temperature range.

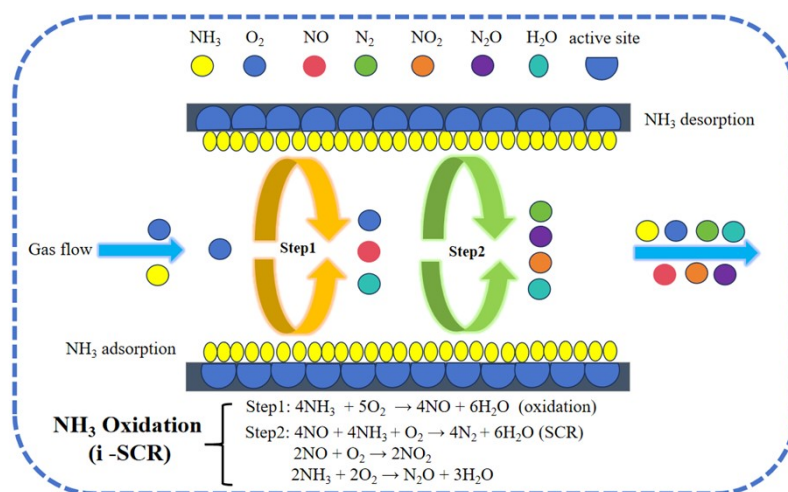

Fig. S9. Schematic diagram of NH<sub>3</sub>-SCO mechanism.

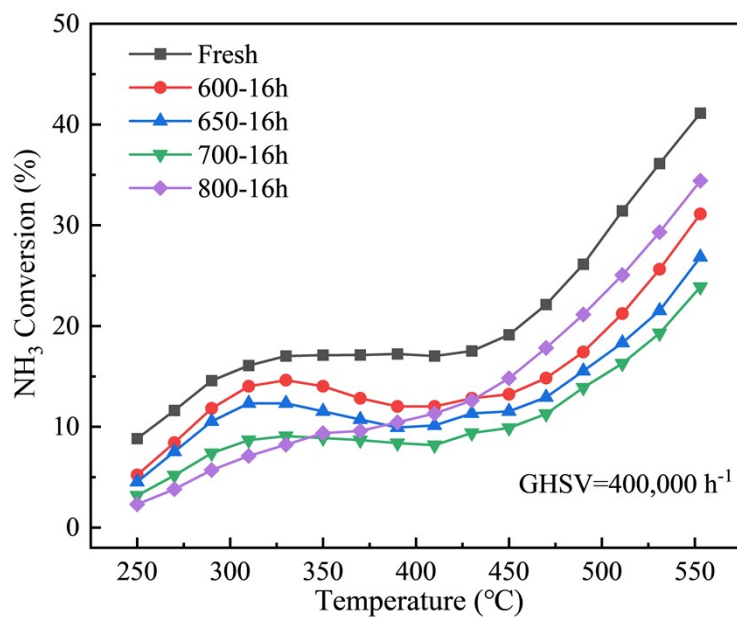

Fig. S10. Steady state  $\text{NH}_3$  oxidation reaction results over fresh sample and different aged samples. 33 mg catalyst was used;  $\text{GHSV}=400,000 \text{ h}^{-1}$ ,  $\text{NH}_3=500 \text{ ppm}$ ,  $\text{O}_2=10\%$ ,  $\text{H}_2\text{O}=3.8\%$ ,  $\text{N}_2$  balance.

In steady-state curves, all samples exhibit two distinct kinetic regimes similar to those in Fig. 7(a).

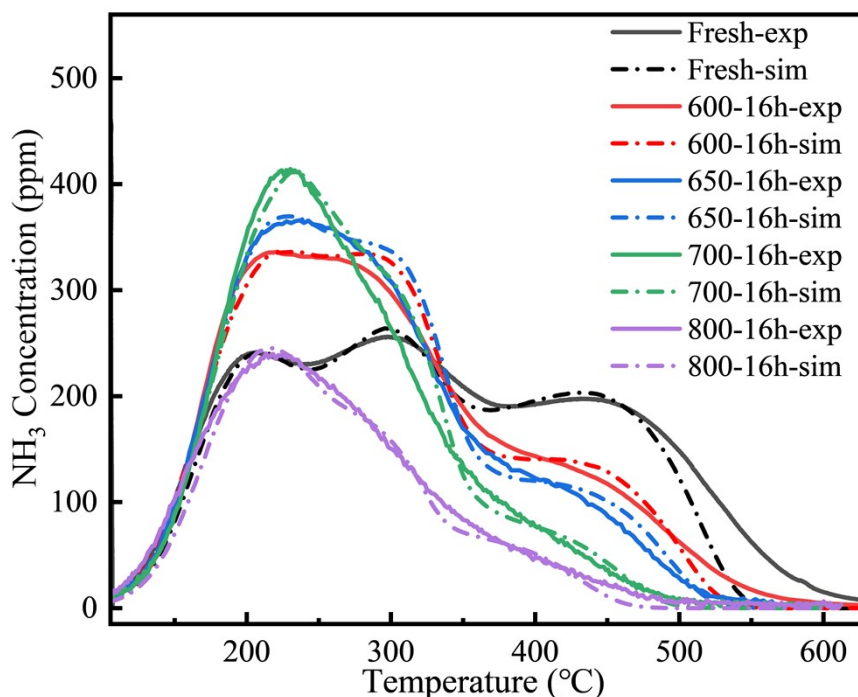

Fig. S11. Experimental and simulation results of  $\text{NH}_3$ -TPD over fresh and different aged samples.

A comparison of the experimental and simulated  $\text{NH}_3$ -TPD desorption profiles demonstrates that the developed model successfully predicts the  $\text{NH}_3$  desorption

behaviour of the fresh catalyst samples. Furthermore, with the kinetic parameters fixed, merely adjusting the active site density enabled the model to accurately reproduce the variation trends in both the position and intensity of the NH<sub>3</sub> desorption peaks for the hydrothermally aged samples. These results collectively validate the rationality and reliability of the NH<sub>3</sub>-TPD model established in this study.

## Nomenclature

| <b>Nomenclature</b> |                                                            |
|---------------------|------------------------------------------------------------|
| $t$                 | Time (s)                                                   |
| $T$                 | Temperature (K)                                            |
| $R$                 | Ideal gas constant (J·mol <sup>-1</sup> ·K <sup>-1</sup> ) |
| $r_j$               | Reaction rate for reaction j (mol/m <sup>3</sup> ·s)       |
| $k_j$               | Rate constant for reaction j (s <sup>-1</sup> )            |
| $A_j$               | Pre-exponential factor for reaction j (s <sup>-1</sup> )   |
| $E_{a,j}$           | Activation energy of reaction j (kJ/mol)                   |
| $E_{a,j}^0$         | Activation energy for reaction j at zero coverage (kJ/mol) |
| $\alpha_j$          | Coverage dependence in reaction j (-)                      |
| $\Omega_k$          | Site density of active site k (mol/m <sup>3</sup> )        |
| $\theta_{i,k}$      | Coverage of species i on storage site k (-)                |
| $y_{i,k}$           | Volume fraction at the reaction layer of specie i (-)      |
